# Supplementary material for: Human Leucocyte Antigens as Prognostic Markers in Head and Neck Squamous Cell Carcinoma
Source: MDPI journal article supplement (doi:10.3390/cancers14153828), 2022-08-07
Supplement: s1 [file s1]

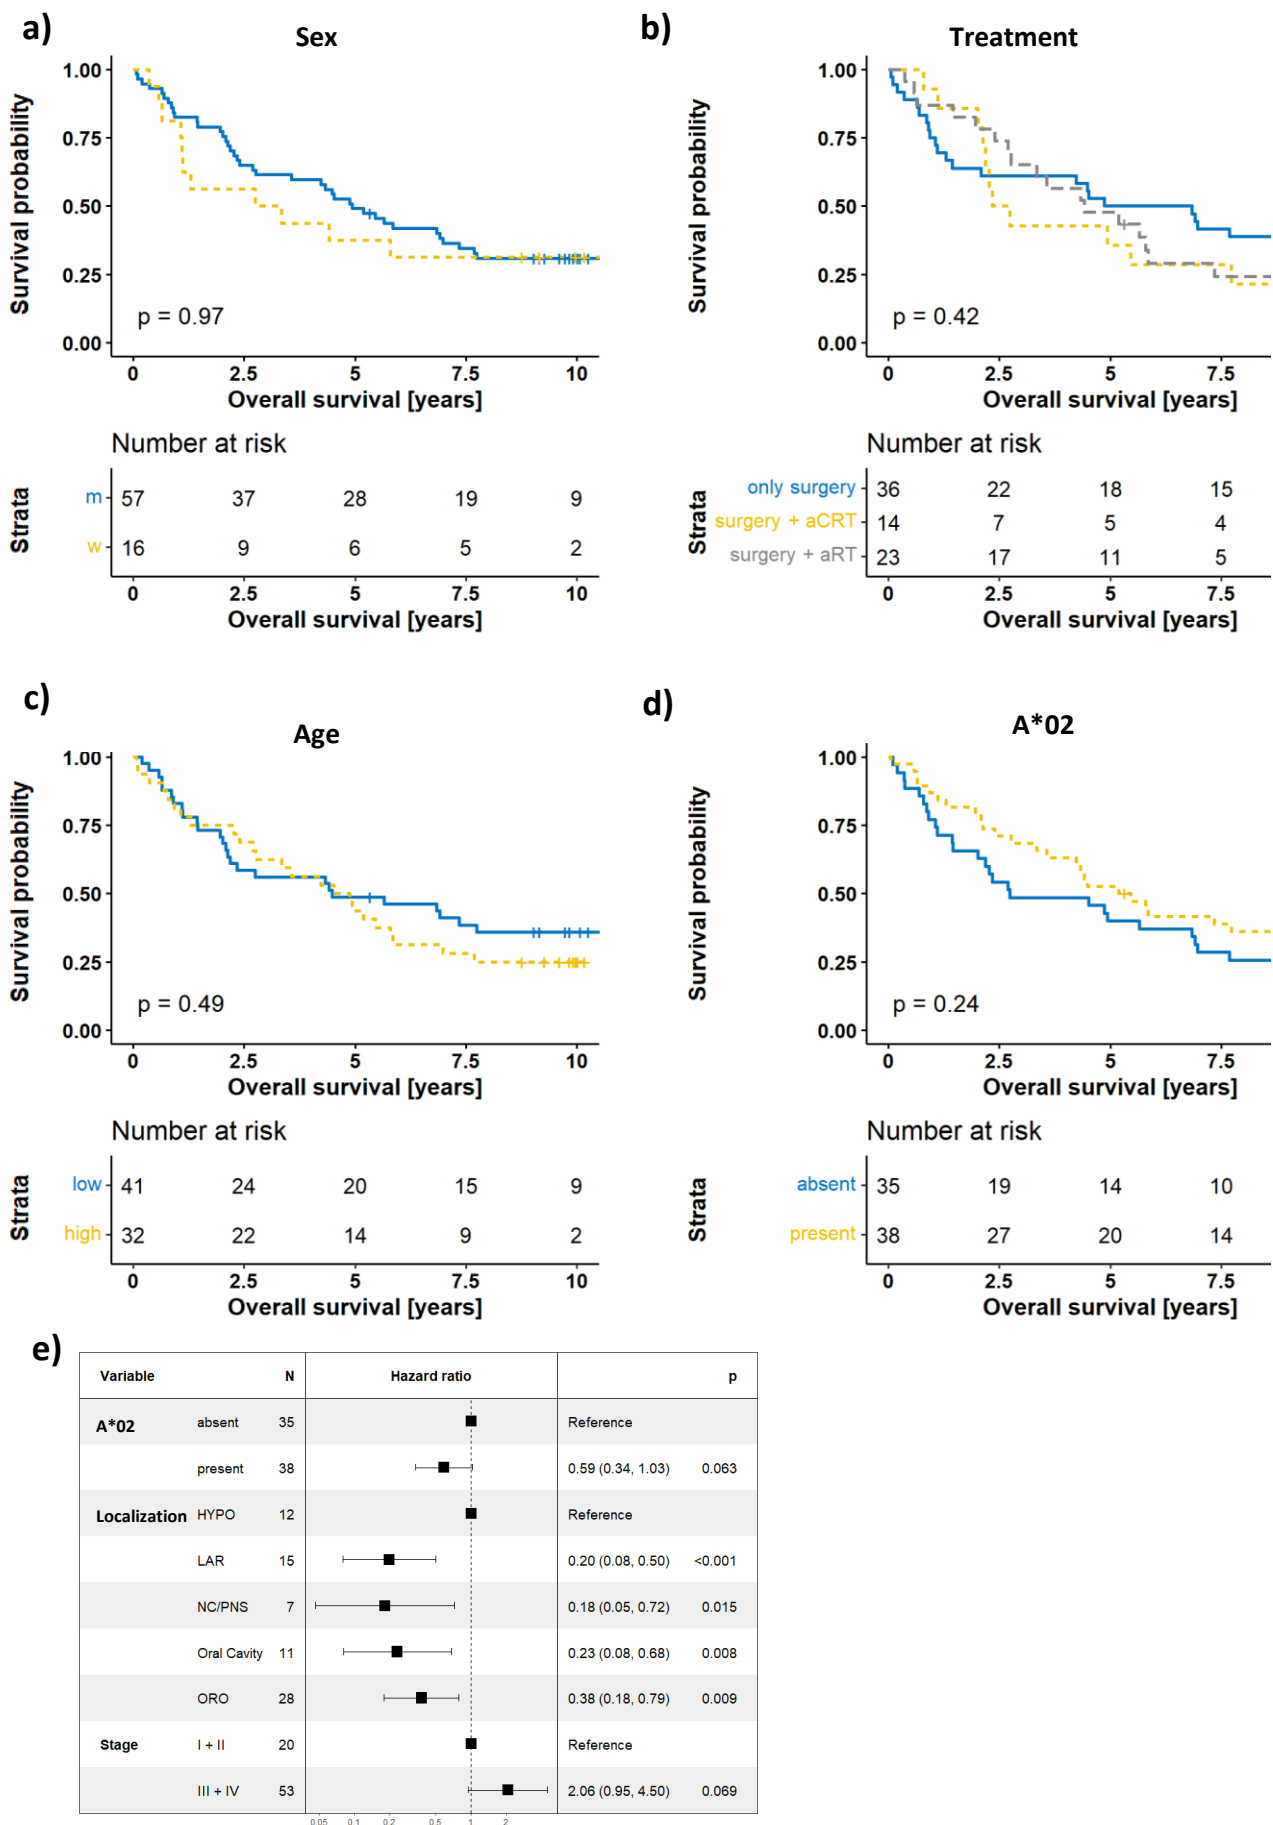

**Figure S1. Associations of clinical covariates and HLA-A\*02 overall survival.** Kaplan-Meier curves of (a) sex, (b) treatment, (c) age and (d) HLA-A\*02 visualize nonparametric survival analysis. (e) HLA-A\*02 multivariate Cox PH model survival analysis corrected for localization and UICC stage. HYPO: hypopharynx; LAR: larynx; NC/PNS: nasal cavity/paranasal sinuses; ORO: oropharynx; p values in the graphs depict the univariate/multivariate Cox PH model results.

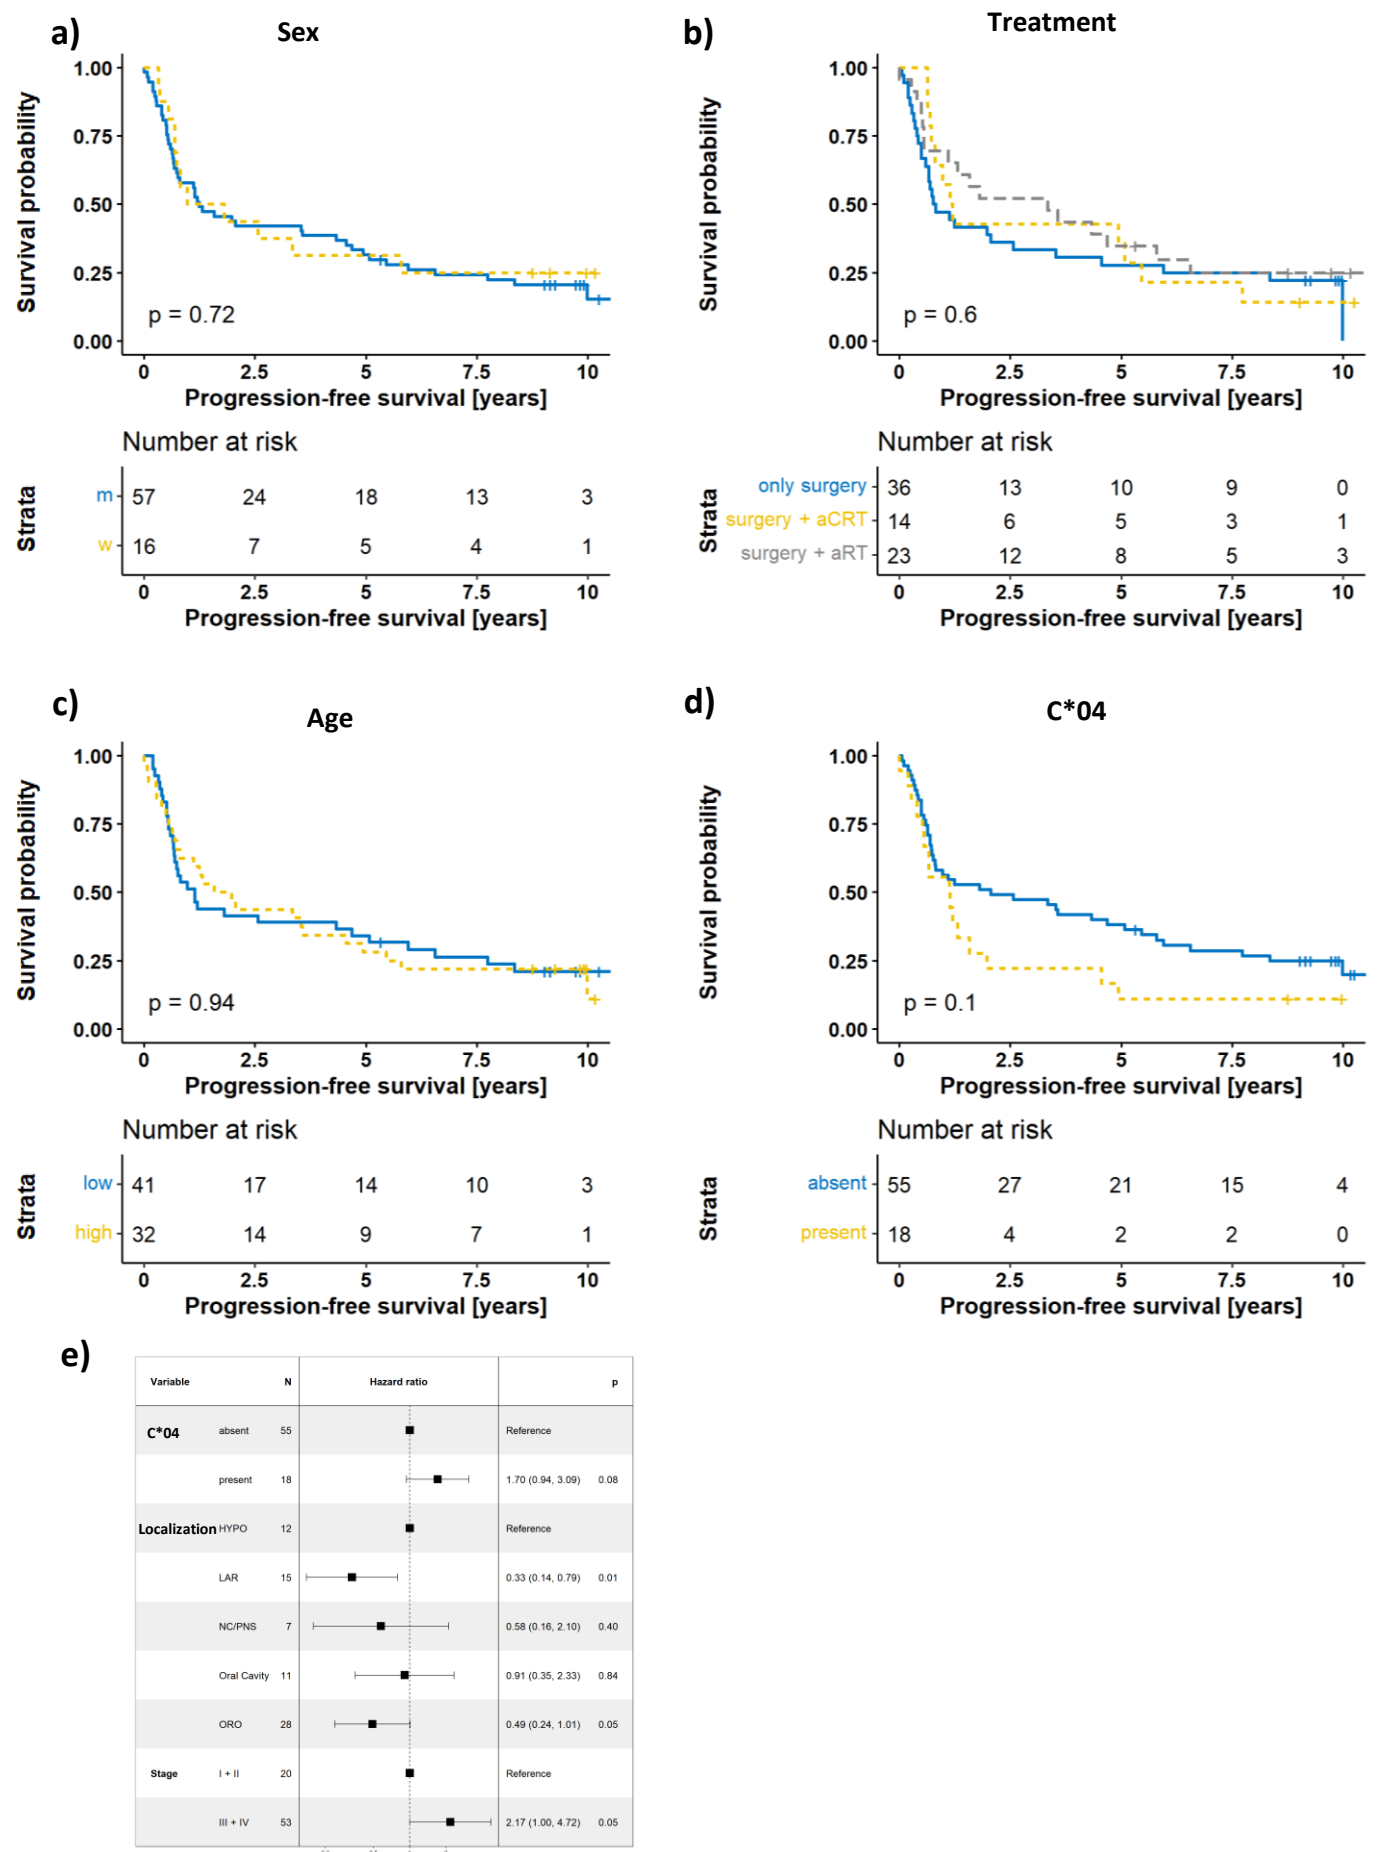

**Figure S2. Associations of clinical covariates and HLA-C\*04 Progression-free survival.** Kaplan-Meier curves of (a) sex, (b) treatment, (c) age and (d) HLA-A\*02 visualize nonparametric survival analysis. (e) HLA-C\*04 multivariate Cox PH model survival analysis corrected for localization and UICC stage. HYPO: hypopharynx; LAR: larynx; NC/PNS: nasal cavity/paranasal sinuses; ORO: oropharynx; p values in the graphs depict the univariate/multivariate Cox PH model results.

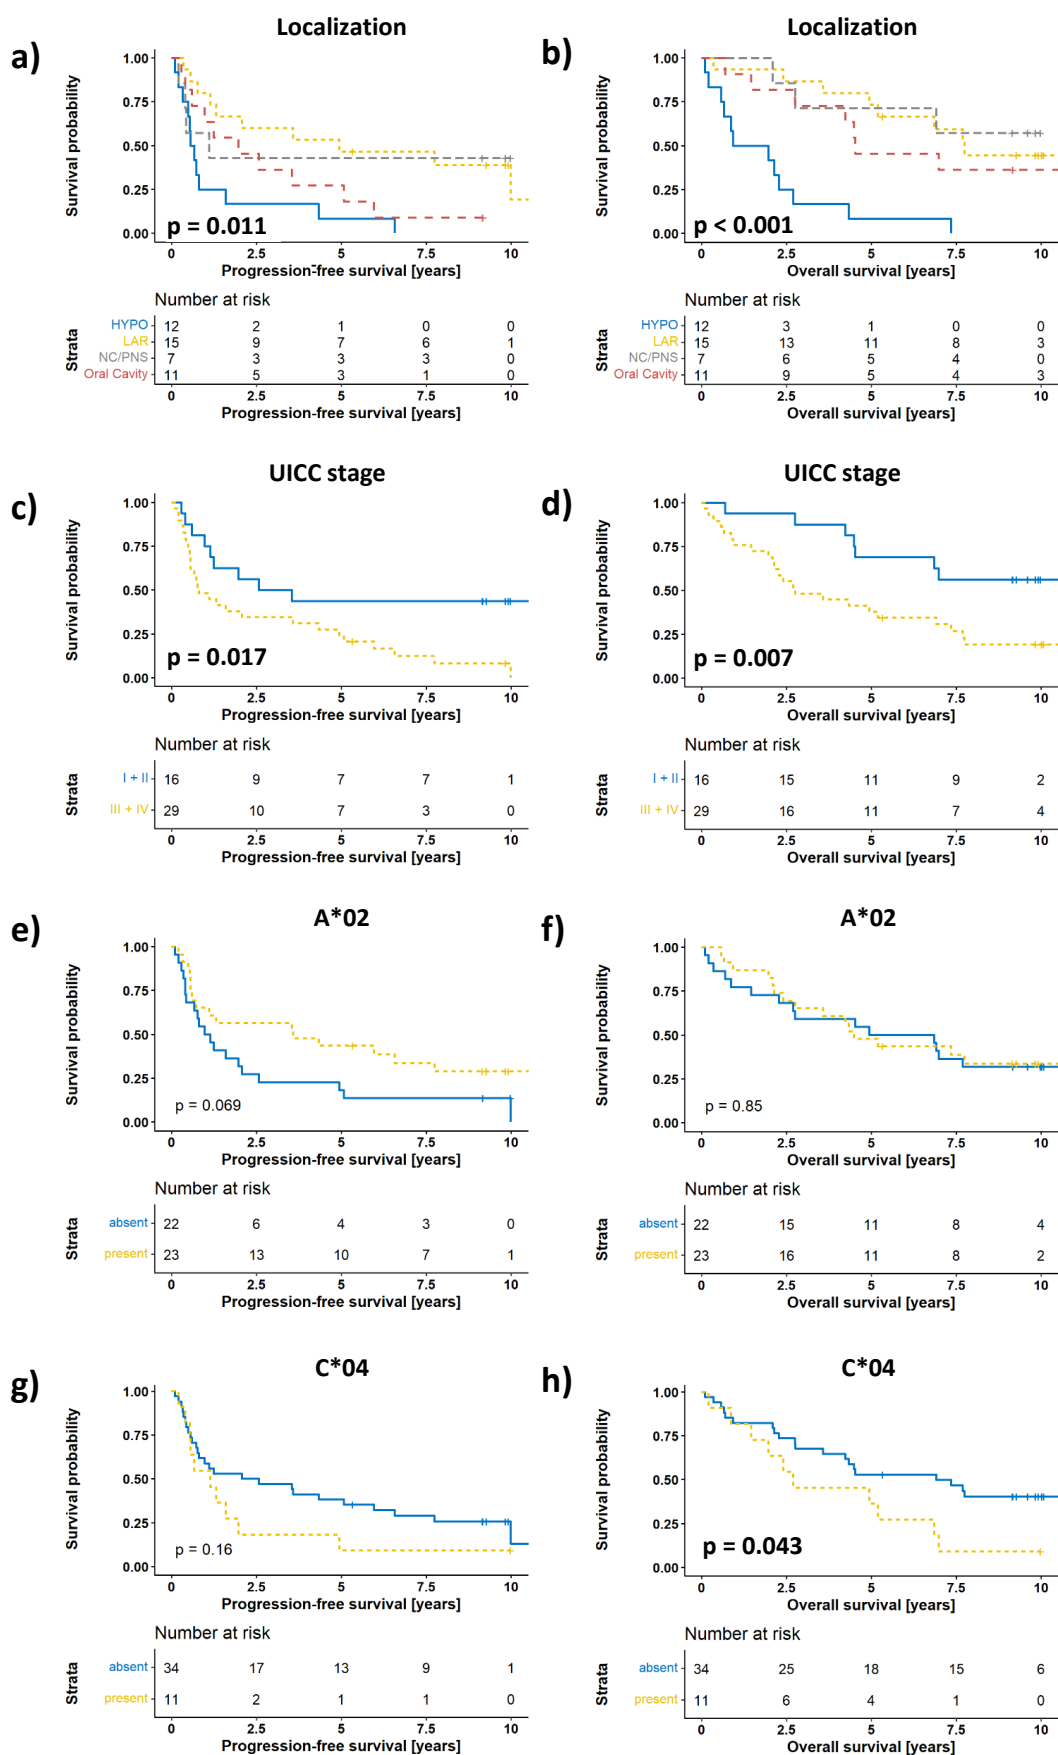

**Figure S3. Associations of clinical covariates and HLA-A\*02 and HLA-C\*04 with progression-free and overall survival excluding the patients with oropharyngeal cancer.** Kaplan-Meier curves of (a-b) localization, (c-d) UICC stage, (e-f) HLA-A\*02 and (g-h) HLA-C\*04 visualize nonparametric survival analysis. HYPO: hypopharynx; LAR: larynx; NC/PNS: nasal cavity/paranasal sinuses; p values in the graphs depict the univariate/multivariate Cox PH model results.

a)

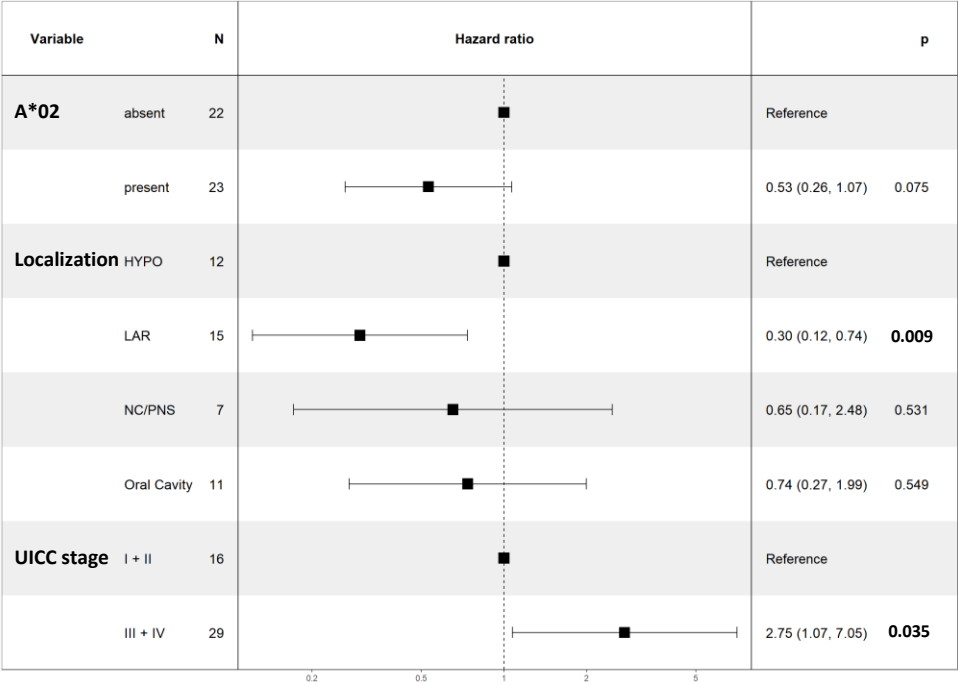

b)

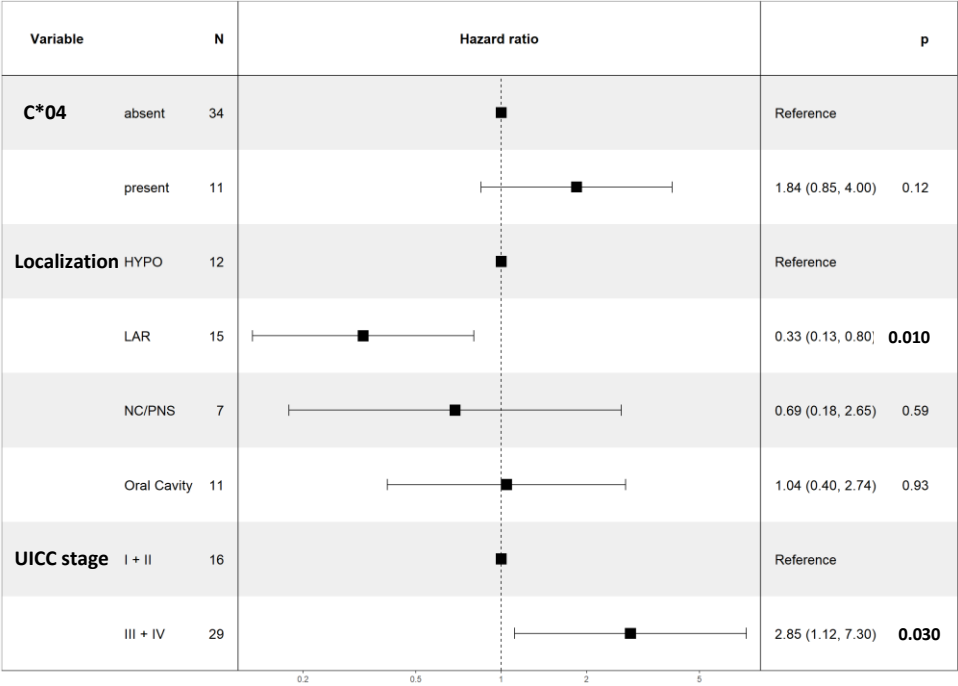

**Figure S4. Multivariate Cox PH model of progression-free survival excluding the patients with oropharyngeal cancer.** Forest plot visualizes the results of a multivariate Cox PH model including localization, UICC stage **(a)** HLA-A\*02 and **(b)** HLA-C\*04. Values depict hazard ratios (lower and upper 95% confidence intervals). HYPO: hypopharynx; LAR: larynx; NC/PNS: nasal cavity/paranasal sinuses; p values in the graphs depict the multivariate Cox PH model results.

a)

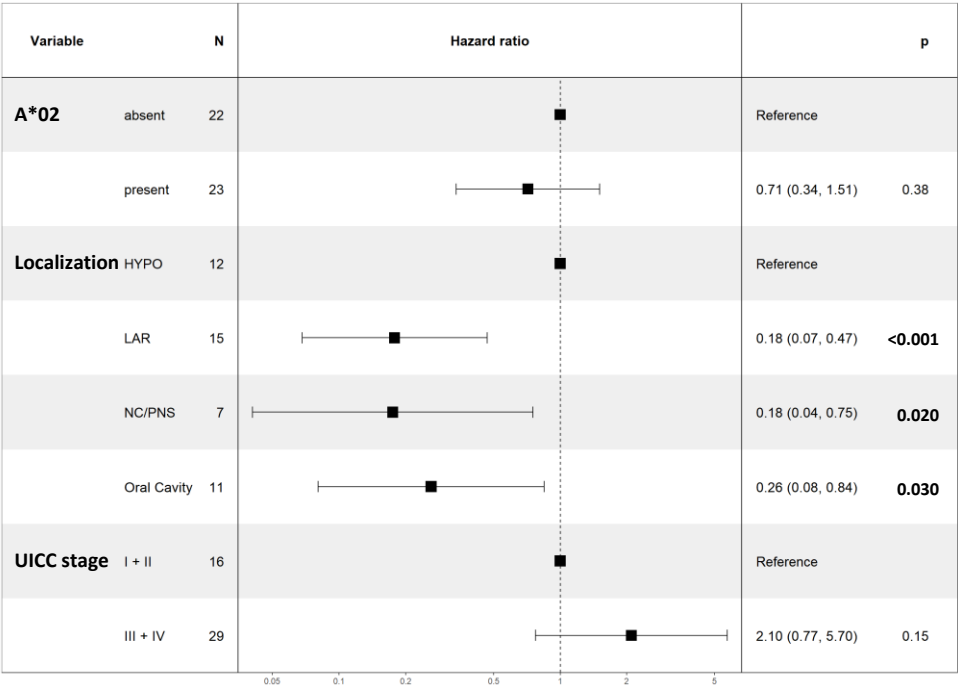

b)

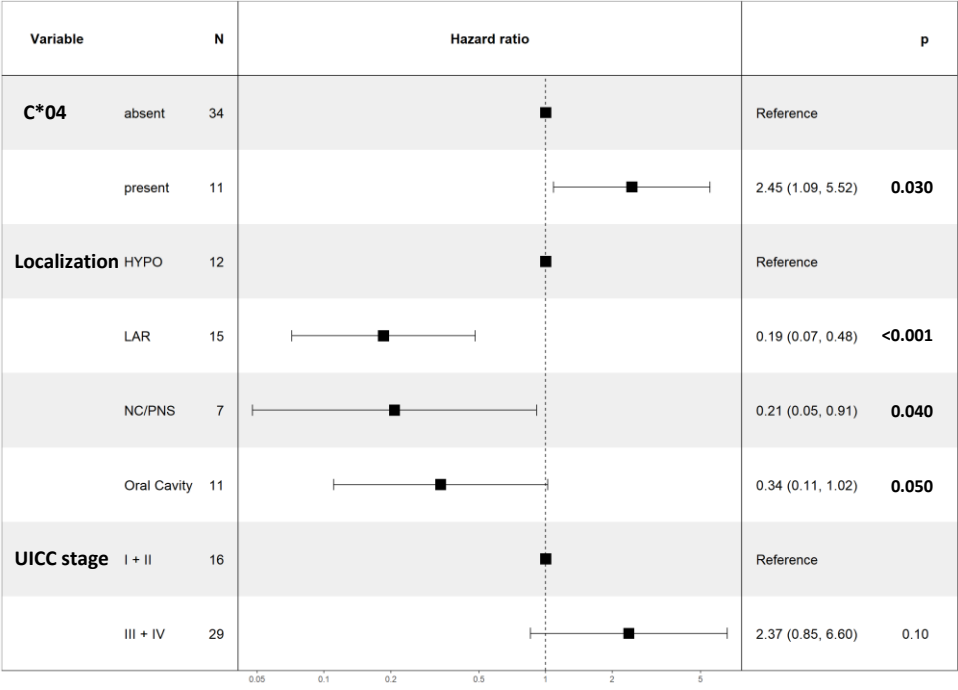

**Figure S5. Multivariate Cox PH model of overall survival excluding the patients with oropharyngeal cancer.** Forest plot visualizes the results of a multivariate Cox PH model including localization, UICC stage **(a)** HLA-A\*02 and **(b)** HLA-C\*04. Values depict hazard ratios (lower and upper 95% confidence intervals). HYPO: hypopharynx; LAR: larynx; NC/PNS: nasal cavity/paranasal sinuses; p values in the graphs depict the multivariate Cox PH model results.
